# Supplementary material for: Association between lactate-to-albumin ratio and 28-days all-cause mortality in patients with sepsis-associated liver injury: a retrospective cohort study
Source: Springer Nature journal article supplement (doi:10.1186/s12879-024-08978-x), 2024-01-09

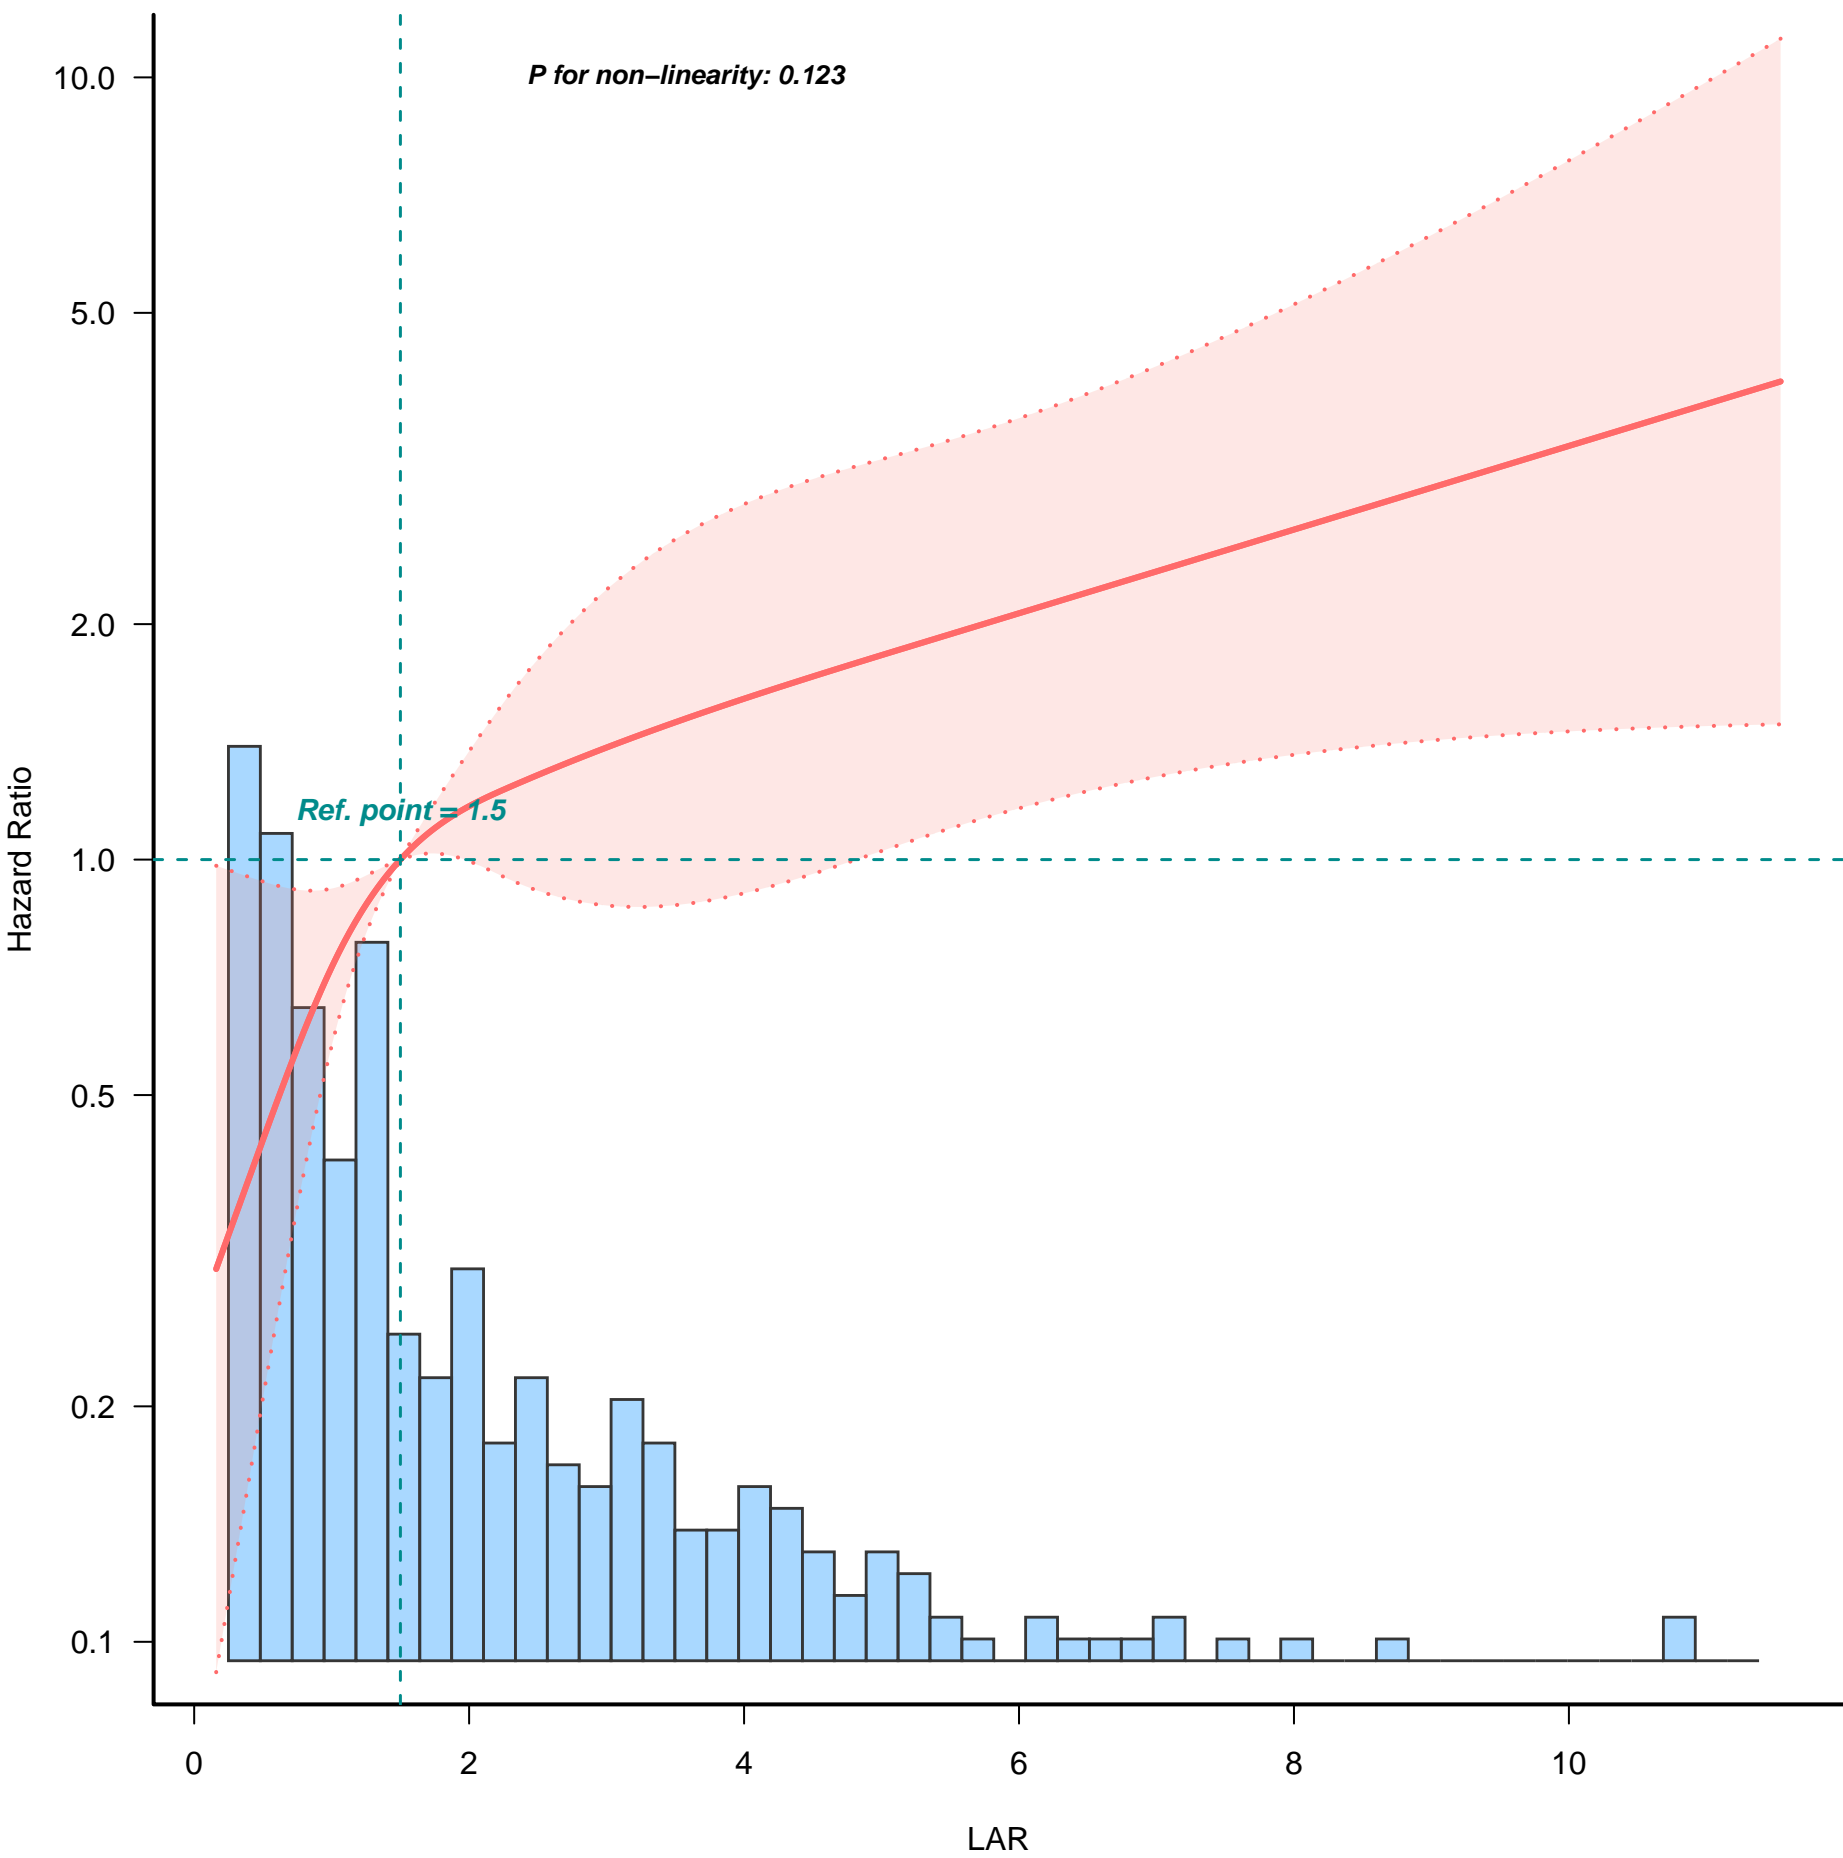

Supplement: MOESM5 [file 26610168]
